# Supplementary material for: Supervised Learning and Multi-Omics Integration Reveals Clinical Significance of Inner Membrane Mitochondrial Protein (IMMT) in Prognostic Prediction, Tumor Immune Microenvironment and Precision Medicine for Kidney Renal Clear Cell Carcinoma
Source: MDPI journal article supplement (doi:10.3390/ijms24108807), 2023-05-15
Supplement: s1 [file s1]

## Supplementary Materials

### Supervised Learning and Multi-omics Integration Reveals Clinical Significance of Inner Membrane Mitochondrial Protein (IMMT) in Prognostic Prediction, Tumor Immune Microenvironment and Precision Medicine for Kidney Renal Clear Cell Carcinoma

Chun-Chi Chen <sup>1</sup>, Pei-Yi Chu <sup>2,3,4,5,\*</sup> and Hung-Yu Lin <sup>2,6,\*</sup>

<sup>1</sup> Section of Urology, Departments of Surgery, Changhua Christian Hospital, Changhua 500, Taiwan; 63481@cch.org.tw

<sup>2</sup> Department of Post-Baccalaureate Medicine, College of Medicine, National Chung Hsing University, Taichung 402, Taiwan

<sup>3</sup> School of Medicine, College of Medicine, Fu Jen Catholic University, New Taipei City 242, Taiwan

<sup>4</sup> Department of Pathology, Show Chwan Memorial Hospital, Changhua 500, Taiwan

<sup>5</sup> National Institute of Cancer Research, National Health Research Institutes, Tainan 704, Taiwan

<sup>6</sup> Research Assistant Center, Show Chwan Memorial Hospital, Changhua 500, Taiwan

\* Correspondence: chu.peiyi@msa.hinet.net (P.-Y.C.); linhungyu700218@gmail.com (H.-Y.L.)

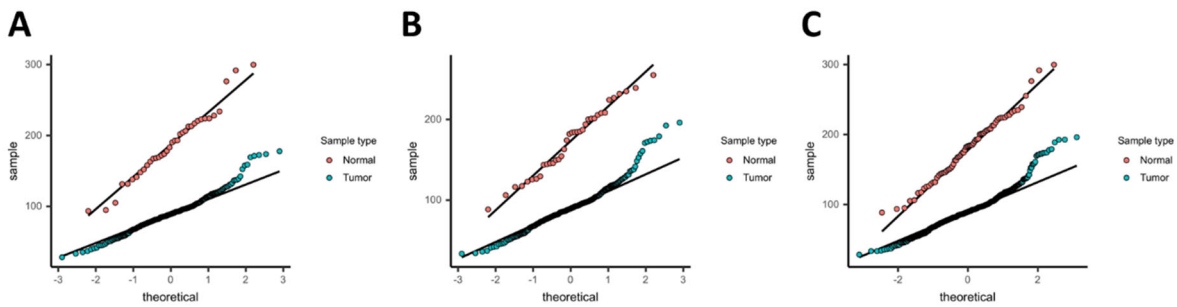

**Supplementary Figure S1.** Quantile-quantile (q-q) plot illustrating the distribution of IMM expression levels of normal and tumor data in Training (A), Test and (B) entire TCGA dataset (C).
